# Supplementary material
Source: MDPI journal article supplement (https://www.mdpi.com/2073-4344/12/10/1188)
Supplement: s1 [file s1]

# **Green Synthesis of Iron Oxide Nanoparticles using *Psidium guajava* L. Leaves Extract and its Application Towards Degradation of Organic Dyes and Anti-microbial Activities**

**Anup Adhikari <sup>1</sup>, Kisan Chhetri <sup>2</sup>, Debendra Acharya <sup>2</sup>, Bishweshwar Pant <sup>3,4,\*</sup> and Achyut Adhikari <sup>1,\*</sup>**

<sup>1</sup> Central Department of Chemistry, Tribhuvan University, Kirtipur, Kathmandu, 44618, Nepal

<sup>2</sup> Department of Nano Convergence Engineering, Jeonbuk National University, Jeonju 561756, South Korea

<sup>3</sup> Carbon Composite Energy Nanomaterials Research Center, Woosuk University, Wanju, Chonbuk 55338, South Korea

<sup>4</sup> Woosuk Institute of Smart Convergence Life Care (WSCLC), Woosuk University, Wanju, Chonbuk 55338, Korea

\* Correspondence: bisup@woosuk.ac.kr (B.P.); achyutraj05@gmail.com (A.A.)

## 1.1 Chemicals, reagents and test organisms

Iron (III) chloride hexahydrate (Merck), Iron (II) chloride tetrahydrate (Merck), sodium hydroxide (Fisher Scientific), methylene blue, methyl orange, H<sub>2</sub>O<sub>2</sub> (30.0%, Merck 64271), DMSO (50%), distilled water, and Whatman filter paper 1 like chemicals, solvents and materials were used. The model bacterial pathogens *Shigella sonnei*, *Staphylococcus aureus*, and *Escherichia coli*, along with fungal pathogens *Candida tropicalis* and *Candida albicans* were collected from Research Institute for Bioscience and Biotechnology (RIBB), Chyasal Road, Lalitpur, Nepal.

## 1.2 Characterization of iron oxide nanoparticles

The formation of IONPs was confirmed by analyzing the absorption band recorded with the help of the SPECORD 200 PLUS, analytikjena (An Endress+Hauser Company) UV-Visible spectrophotometer. Scanning range was maintained in the range of 250 – 600 nm at a medium scanning rate and resolution of 1 nm. Distilled water was used as a blank reference for the baseline correction of the spectrophotometer during the experiment. All the samples were loaded into a 2 mL quartz cuvette with a 1 cm path length.

The presence of secondary metabolites in the *Psidium guajava* extract and IONPs were investigated empirically using FTIR (Nicolet iS50 FT-IR), with spectra scanned in the range of 4000–400 cm<sup>-1</sup>.

XPS measurements were carried out on Nexsa XPS system (ThermoFisher Scientific UK). The experimental condition was adjusted to, base pressure:  $2.0 \times 10^{-7}$  Torr, beam size: 400  $\mu$ m, pass energy: 50 eV, dwell time: 50 ms, and step: 0.1 eV/step. All samples C<sub>1s</sub>, N<sub>1s</sub>, O<sub>1s</sub>, and Fe<sub>2p</sub> signals were acquired using Al K $\alpha$  monochromatized X-ray radiation (h $\nu$  = 1486.6 eV).

For determining crystallinity of the IONPs, a routine powder X-ray diffraction pattern was recorded using the Rigaku D/MAX-2500/pc diffractometer with monochromatic Cu K $\alpha$  radiation of wavelength 1.540598 Å 2 $\theta$  scanning between 5° and 80°. The crystallite size of powdered IONPs was determined via Scherrer's equation [7].

$$D = \frac{k\lambda}{\beta \cos \theta}$$

where,

$D$  = crystalline grain size,

$k$  = dimensionless shape factor, with a value close to unity,

$\lambda$  = wavelength of x-ray radiation

$\theta$  = Bragg's angle (half of the  $2\theta$  value of chosen peak), (in radians), and

$\beta$  = full width at half maximum, FWHM (in radians)

Field emission scanning electron microscopy (FE-SEM) was used to study the morphology of nanoparticles running at a voltage of 10 kV.

High resolution transmission electron microscopy (HR-TEM) was used to visualize the size and morphology of nanoparticles.

To determine the stability of the colloidal nanostructure system, the zeta potential of the IONPs was measured using a HORIBA Scientific SZ-100V2. IONP samples were adjusted to 2, 4, 6, 8, 10, and 12 pH with NaOH. Subsequently, 1 mL of the pH-adjusted sample was injected into a flow cell. All samples were measured at a fixed temperature and angle of 25°C and 17°, respectively.

## 2.1 XPS analysis of biosynthesized IONPs

**Table S1**

| Name  | Peak (BE) | FWHM (eV) | Area CPS (eV) | Atomic % |
|-------|-----------|-----------|---------------|----------|
| C 1s  | 284.36    | 1.53      | 106140.1      | 29.33    |
| N 1s  | 406.85    | 1.21      | 14026.07      | 2.51     |
| O 1s  | 530.46    | 3.34      | 538697.3      | 61.54    |
| Fe 2p | 709.49    | 3.66      | 247298.2      | 6.62     |

BE and FWHM indicates binding energy and full width at half maxima respectively

## 2.2 Calculation of average crystallite size biosynthesized IONPs using XRD

**Table S2**

| No. | 2 $\theta$ in degree | FWHM in degree | h | k | l | $\theta$ in radian | FWHM in radian | Size (nm) | Average size (nm) |
|-----|----------------------|----------------|---|---|---|--------------------|----------------|-----------|-------------------|
| 1   | 31.68845             | 0.16236        | 1 | 1 | 1 | 0.277274           | 0.002841       | 49.00254  | 21.75             |
| 2   | 32.56763             | 0.454608       | 2 | 2 | 0 | 0.284967           | 0.007956       | 17.46207  |                   |
| 3   | 35.15226             | 0.64944        | 3 | 1 | 1 | 0.307582           | 0.011365       | 12.13935  |                   |
| 4   | 45.46933             | 0.454608       | 4 | 0 | 0 | 0.397857           | 0.007956       | 16.77468  |                   |
| 5   | 56.4963              | 0.32472        | 4 | 2 | 2 | 0.494343           | 0.005683       | 22.4245   |                   |

## 2.2 Degradation of methylene blue by biosynthesized IONPs

**Table S3**

| Time (min) | Maximum Absorbance (A) | Degradation % |
|------------|------------------------|---------------|
| 0          | 4.1122                 | 0             |
| 5          | 3.5123                 | 14.58829823   |
| 15         | 2.8094                 | 31.68133846   |
| 25         | 2.481                  | 39.66733136   |
| 35         | 2.381                  | 42.09911969   |
| 45         | 2.22191                | 45.96785176   |
| 55         | 1.85382                | 54.91902145   |
| 65         | 1.26956                | 69.12698799   |
| 75         | 0.88405                | 78.50177521   |
| 85         | 0.816                  | 80.15660717   |
| 95         | 0.736                  | 82.10203784   |

## 2.3 Degradation of methyl orange by biosynthesized IONPs

**Table S4**

| Time (min) | Maximum Absorbance (A) | Degradation % |
|------------|------------------------|---------------|
| 0          | 5.6859                 | 0             |
| 5          | 4.6373                 | 18.44211119   |
| 25         | 4.6373                 | 18.44211119   |
| 45         | 4.7977                 | 15.6210978    |
| 65         | 4.0446                 | 28.86614256   |
| 85         | 4.06                   | 28.59529714   |
| 105        | 3.6184                 | 36.36187763   |
| 125        | 3.5184                 | 38.12061415   |
| 145        | 3.2184                 | 43.39682372   |
| 165        | 3.0184                 | 46.91429677   |

|     |        |             |
|-----|--------|-------------|
| 185 | 2.8184 | 50.43176982 |
| 205 | 2.6184 | 53.94924286 |

## 2.4 Anti-bacterial activity of biosynthesized IONPs

**Table S5**

| Bacteria         | Diameter of zone of inhibition (ZOI) in mm |         |               |                  |
|------------------|--------------------------------------------|---------|---------------|------------------|
|                  | Neomycin (PC) (20                          | IONPs   | Plant extract | 50%              |
|                  | μL)                                        | (20 μL) | (PE) (20 μL)  | DMSO(NC) (20 μL) |
| <i>S. sonnei</i> | 30                                         | 13      | 12            | -                |
| <i>S. aureus</i> | 23                                         | 13      | 11            | -                |
| <i>E. coli</i>   | 18                                         | -       | 11            | -                |

## 2.5 Anti-fungal activity of biosynthesized IONPs

**Table S6**

| Fungi                | Diameter of zone of inhibition (ZOI) in mm |         |               |                  |
|----------------------|--------------------------------------------|---------|---------------|------------------|
|                      | Clotrimazole                               | IONPs   | Plant extract | 50%              |
|                      | (PC) (20 μL)                               | (20 μL) | (PE) (20 μL)  | DMSO(NC) (20 μL) |
| <i>C. tropicalis</i> | 25                                         | 15      | 11            | -                |
| <i>C. albicans</i>   | 22                                         | 13      | 7             | -                |

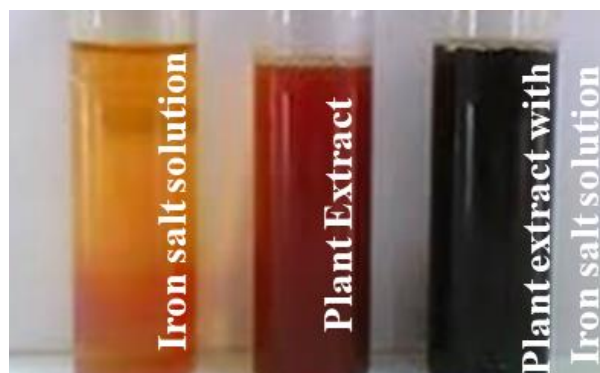

**Figure S1.** Visible color change illustrating the formation of IONPs

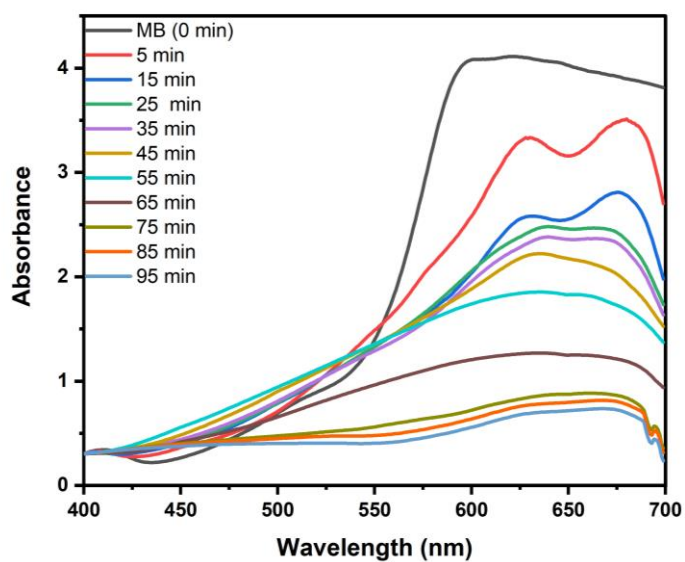

**Figure S2.** UV-Vis absorption of methylene blue at a different time in presence of IONPs

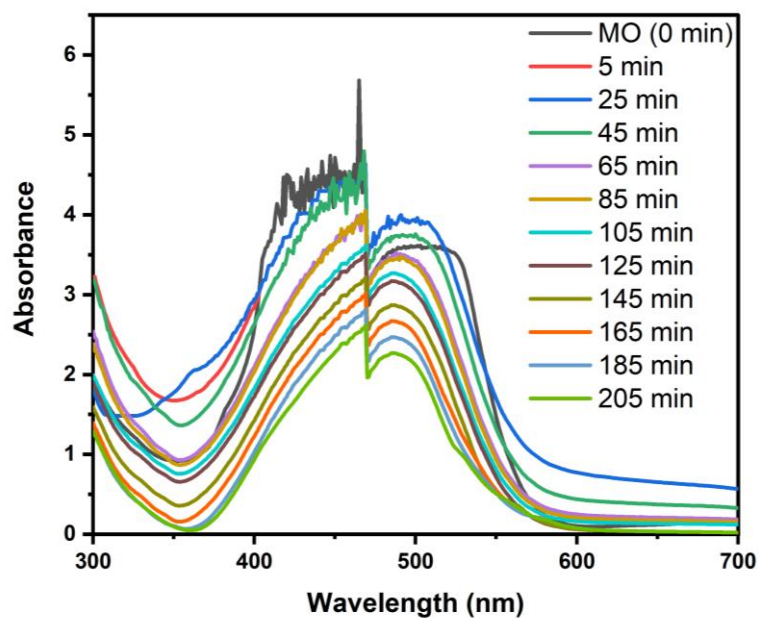

**Figure S3.** UV-Vis absorption of methyl orange at a different time in presence of IONPs
